# Supplementary material for: Comparative Transcriptomic Analysis of Archival Human Vestibular Schwannoma Tissue from Patients with and without Tinnitus
Source: MDPI journal article supplement (doi:10.3390/jcm12072642), 2023-04-01
Supplement: s1 [file s1]

**SUPPLEMENTAL MATERIAL for “Comparative transcriptomic analysis of archival human vestibular schwannoma tissue from patients with or without tinnitus”**

**Table S1. Individual demographic and clinical values of the VS study population**

| ID                     | Sex | Age<br>(years) | Pre-<br>surgical<br>tumor<br>size (mm) | Tumor<br>side<br>(L/R) | Ipsilateral    |           | Contralateral  |        |
|------------------------|-----|----------------|----------------------------------------|------------------------|----------------|-----------|----------------|--------|
|                        |     |                |                                        |                        | PTA<br>(dB HL) | WR<br>(%) | PTA<br>(dB HL) | WR (%) |
| Without tinnitus (n=9) |     |                |                                        |                        |                |           |                |        |
| VS.N1                  | F   | 61             | 12                                     | R                      | 54             | 32%       | 32             | 96%    |
| VS.N2 <sup>a</sup>     | F   | 18             | 28                                     | L                      | 120            | 0%        | 6              | 98%    |
| VS.N3                  | M   | 37             | 30                                     | L                      | 120            | 0%        | 10             | 100%   |
| VS.N4                  | M   | 69             | 40                                     | R                      | 38             | 6%        | 5              | 94%    |
| VS.N5                  | M   | 50             | 25                                     | L                      | 41             | 22%       | 11             | 100%   |
| VS.N6                  | M   | 27             | 47                                     | L                      | 40             | 88%       | 10             | 92%    |
| VS.N7 <sup>b</sup>     | F   | 58             | 27                                     | R                      | 64             | 80%       | 10             | 100%   |
| VS.N8 <sup>b</sup>     | M   | 49             | 36                                     | L                      | 120            | 0%        | 58             | 84%    |
| VS.N9                  | F   | 79             | 30                                     | L                      | 120            | 0%        | 35             | 96%    |
| With tinnitus (n=10)   |     |                |                                        |                        |                |           |                |        |
| VS.Y1                  | F   | 67             | 17                                     | R                      | 36             | 80%       | 14             | 100%   |
| VS.Y2 <sup>a</sup>     | F   | 20             | 33                                     | L                      | 100            | 0%        | 120            | 0%     |
| VS.Y3 <sup>b</sup>     | M   | 39             | 21                                     | L                      | 13             | 92%       | 9              | 100%   |
| VS.Y4                  | M   | 71             | 21                                     | L                      | 86             | 0%        | 30             | 90%    |
| VS.Y5                  | M   | 57             | 30                                     | L                      | 81             | 0%        | 6              | 98%    |
| VS.Y6                  | M   | 28             | 25                                     | R                      | 24             | 96%       | 21             | 96%    |
| VS.Y7                  | F   | 58             | 18                                     | L                      | 54             | 74%       | 16             | 92%    |
| VS.Y8                  | M   | 43             | 32                                     | L                      | 29             | 82%       | 4              | 98%    |
| VS.Y9                  | M   | 25             | 29                                     | L                      | 36             | 12%       | 8              | 98%    |
| VS.Y10                 | M   | 28             | 18                                     | L                      | 9              | 100%      | 8              | 98%    |

Age, sex, tumor size, and presurgical pure tone average (PTA) and word recognition (WR) for the ipsilateral ear of patients with VS included in this study. Cases were stratified by presence (n=10) or absence (n=9) of tinnitus. Abbreviations: dB, decibel; F, female; HL, hearing level; ID, anonymized study identification number; L, left; M, male; R, right. Note: <sup>a</sup> Had neurofibromatosis type 2-related VS. The remainder of patients had sporadic VS. <sup>b</sup> Were excluded from the sequencing experiments due to RNA degradation.
